# Supplementary material
Source: PubMed Central journal article supplement (PMC2769034)
Supplement: 109.027466_1.pdf [file 109.027466_1.pdf]

## Hepatic cytochrome P450 enzyme alterations in humans with progressive stages of non-alcoholic fatty liver disease

Craig D. Fisher, Andrew J. Lickteig, Lisa M. Augustine, James Ranger-Moore, Jonathan P. Jackson, Stephen S. Ferguson, Nathan J. Cherrington

**Supplemental data table 1.** Liver tissue donor information

| Sample# | Patient ID | Gender  | Age     | Diagnosis |
|---------|------------|---------|---------|-----------|
| 1       | D386       | Male    | 45      | Normal    |
| 2       | D418       | Male    | 18      | Normal    |
| 3       | D486       | Female  | 58      | Normal    |
| 4       | UC9113     | Female  | 59      | Normal    |
| 5       | UC9130     | Female  | 20      | Normal    |
| 6       | UC9203     | Female  | 24      | Normal    |
| 7       | UC9406     | Male    | 20      | Normal    |
| 8       | UC9409     | Male    | 21      | Normal    |
| 9       | UC9410     | Male    | 20      | Normal    |
| 10      | UC9503     | Female  | 45      | Normal    |
| 29      | HH1356     | Female  | 25      | Normal    |
| 30      | HH1274     | Female  | 56      | Normal    |
| 31      | HH1281     | Male    | 16      | Normal    |
| 32      | HH1249     | Male    | 59      | Normal    |
| 33      | HH1202     | Female  | 67      | Normal    |
| 34      | HH1308     | Male    | 64      | Normal    |
| 35      | HH1246     | Male    | 70      | Normal    |
| 36      | HH1220     | Female  | 47      | Normal    |
| 53      | D585       | Male    | 60      | Normal    |
| 54      | D587       | Male    | 49      | Normal    |
| 11      | D218       | Female  | 51      | Steatosis |
| 12      | D162       | Female  | 66      | Steatosis |
| 14      | UMN753     | Male    | 16      | Steatosis |
| 15      | UMN1058    | Unknown | Unknown | Steatosis |
| 37      | HH1121     | Female  | 65      | Steatosis |
| 38      | HH1240     | Female  | 47      | Steatosis |
| 39      | HH1299     | Male    | 57      | Steatosis |
| 40      | HH1124     | Male    | 40      | Steatosis |
| 41      | HH1248     | Female  | 42      | Steatosis |

“DMD 27466”

|    |         |         |         |                         |
|----|---------|---------|---------|-------------------------|
| 42 | HH1209  | Female  | 30      | Steatosis               |
| 43 | HH1226  | Male    | 53      | Steatosis               |
| 16 | D346    | Female  | 55      | NASH (with fatty liver) |
| 17 | D515    | Female  | 56      | NASH (with fatty liver) |
| 18 | D522    | Male    | 60      | NASH (with fatty liver) |
| 19 | UC9415  | Unknown | Unknown | NASH (with fatty liver) |
| 20 | UMN935  | Female  | 60      | NASH (with fatty liver) |
| 21 | UMN1098 | Female  | 59      | NASH (with fatty liver) |
| 22 | UMN1152 | Female  | 41      | NASH (with fatty liver) |
| 47 | UMN1219 | Female  | 68      | NASH (with fatty liver) |
| 48 | UNM1214 | Female  | 58      | NASH (with fatty liver) |
| 50 | UMN1249 | Female  | 55      | NASH (with fatty liver) |
| 23 | D477    | Female  | 46      | NASH (no longer fatty)  |
| 24 | UMN801  | Female  | 44      | NASH (no longer fatty)  |
| 25 | UMN1138 | Male    | 52      | NASH (no longer fatty)  |
| 26 | UMN1144 | Male    | 33      | NASH (no longer fatty)  |
| 27 | UMN1151 | Male    | 59      | NASH (no longer fatty)  |
| 28 | UMN1188 | Male    | 66      | NASH (no longer fatty)  |
| 44 | D548    | Female  | 45      | NASH (no longer fatty)  |
| 49 | UMN1253 | Female  | 65      | NASH (no longer fatty)  |
| 51 | UMN1247 | Female  | 52      | NASH (no longer fatty)  |
| 52 | UMN1228 | Male    | 62      | NASH (no longer fatty)  |
| 55 | UMN1259 | Male    | 56      | NASH (no longer fatty)  |

**Supplemental data-table 2.** Substrate probes and incubation conditions to assess human microsomal P450 activity.

| <u>Enzyme</u> | <u>Substrate</u> | <u>Concentration</u> | <u>Incubation Time</u> | <u>Marker Metabolite</u>        |
|---------------|------------------|----------------------|------------------------|---------------------------------|
| CYP1A2        | Phenacetin       | 100 $\mu$ M          | 60 min                 | Acetaminophen                   |
| CYP2A6        | Coumarin         | 1 $\mu$ M            | 5 min                  | 7-Hydroxycoumarin               |
| CYP2B6        | Bupropion        | 250 $\mu$ M          | 40 min                 | Hydroxybupropion                |
| CYP2C8        | Paclitaxel       | 20 $\mu$ M           | 20 min                 | 6 $\alpha$ -Hydroxypaclitaxel   |
| CYP2C9        | Diclofenac       | 25 $\mu$ M           | 8 min                  | 4'-Hydroxydiclofenac            |
| CYP2C9        | Tolbutamide      | 280 $\mu$ M          | 40 min                 | Hydroxytolbutamide              |
| CYP2C19       | S-Mephenytoin    | 250 $\mu$ M          | 60 min                 | 4'-Hydroxymephenytoin           |
| CYP2D6        | Dextromethorphan | 15 $\mu$ M           | 25 min                 | Dextrorphan                     |
| CYP2E1        | Chlorzoxazone    | 250 $\mu$ M          | 20 min                 | 6-Hydroxychlorzoxazone          |
| CYP3A4        | Testosterone     | 200 $\mu$ M          | 14 min                 | 6 $\beta$ - Hydroxytestosterone |
